# Supplementary material for: Identifying the structural features and diversifying the chemical domain of peripherally acting CB1 receptor antagonists using molecular modeling techniques
Source: Royal Society of Chemistry journal article supplement (doi:10.1039/c5ra20612j), 2015-12-17
Supplement: c5ra20612j1.pdf [file c5ra20612j1.pdf]

Table S1. Experimental and predictive activities of external set compounds (S1-S142).

| <b>Compound</b> | <b>Experimental <math>pK_i</math></b> | <b>Predicted <math>pK_i</math></b> | <b>Residual</b> |
|-----------------|---------------------------------------|------------------------------------|-----------------|
| S1              | 9.124                                 | 8.701                              | 0.423           |
| S2              | 9.387                                 | 9.537                              | -0.150          |
| S3              | 9.795                                 | 8.974                              | 0.821           |
| S4              | 9.229                                 | 9.306                              | -0.077          |
| S5              | 8.853                                 | 8.458                              | 0.395           |
| S6              | 9.251                                 | 8.312                              | 0.939           |
| S7              | 9.602                                 | 8.824                              | 0.778           |
| S8              | 9.585                                 | 9.146                              | 0.439           |
| S9              | 9.920                                 | 9.616                              | 0.304           |
| S10             | 8.795                                 | 9.276                              | -0.481          |
| S11             | 9.259                                 | 8.796                              | 0.463           |
| S12             | 8.769                                 | 9.256                              | -0.487          |
| S13             | 8.346                                 | 9.102                              | -0.756          |
| S14             | 6.651                                 | 7.255                              | -0.604          |
| S15             | 7.494                                 | 8.091                              | -0.597          |
| S16             | 6.931                                 | 7.679                              | -0.748          |
| S17             | 6.809                                 | 7.371                              | -0.562          |
| S18             | 6.903                                 | 7.715                              | -0.812          |
| S19             | 7.619                                 | 7.283                              | 0.336           |
| S20             | 6.850                                 | 7.010                              | -0.160          |
| S21             | 7.221                                 | 7.748                              | -0.527          |
| S22             | 6.679                                 | 7.257                              | -0.578          |
| S23             | 6.818                                 | 7.469                              | -0.651          |
| S24             | 7.124                                 | 6.601                              | 0.523           |
| S25             | 7.275                                 | 7.726                              | -0.451          |
| S26             | 5.623                                 | 5.992                              | -0.369          |
| S27             | 6.183                                 | 6.173                              | 0.010           |
| S28             | 6.293                                 | 6.819                              | -0.526          |
| S29             | 6.958                                 | 7.738                              | -0.780          |
| S30             | 7.229                                 | 6.461                              | 0.768           |
| S31             | 7.744                                 | 7.594                              | 0.150           |
| S32             | 6.191                                 | 5.783                              | 0.408           |
| S33             | 8.301                                 | 7.454                              | 0.847           |
| S34             | 7.602                                 | 7.271                              | 0.331           |
| S35             | 7.408                                 | 7.357                              | 0.051           |
| S36             | 6.692                                 | 6.854                              | -0.162          |
| S37             | 7.481                                 | 6.641                              | 0.840           |
| S38             | 7.347                                 | 6.58                               | 0.767           |
| S39             | 6.337                                 | 6.581                              | -0.244          |
| S40             | 6.625                                 | 7.125                              | -0.500          |
| S41             | 6.501                                 | 7.125                              | -0.624          |
| S42             | 6.522                                 | 6.447                              | 0.075           |
| S43             | 6.777                                 | 6.873                              | -0.096          |
| S44             | 7.301                                 | 8.134                              | -0.833          |
| S45             | 6.978                                 | 6.797                              | 0.181           |
| S46             | 6.623                                 | 6.818                              | -0.195          |
| S47             | 8.327                                 | 7.856                              | 0.471           |

---

|     |       |       |        |
|-----|-------|-------|--------|
| S48 | 8.045 | 8.919 | -0.874 |
| S49 | 8.045 | 8.945 | -0.900 |
| S50 | 8.119 | 8.925 | -0.806 |
| S51 | 8.102 | 7.810 | 0.292  |
| S52 | 8.421 | 8.933 | -0.512 |
| S53 | 8.283 | 8.628 | -0.345 |
| S54 | 7.522 | 7.003 | 0.519  |
| S55 | 7.853 | 7.061 | 0.792  |
| S56 | 7.522 | 7.651 | -0.129 |
| S57 | 8.000 | 7.714 | 0.286  |
| S58 | 7.913 | 6.979 | 0.934  |
| S59 | 7.309 | 7.549 | -0.240 |
| S60 | 7.921 | 7.283 | 0.638  |
| S61 | 8.522 | 8.471 | 0.051  |
| S62 | 7.886 | 7.664 | 0.222  |
| S63 | 7.698 | 7.630 | 0.068  |
| S64 | 7.886 | 7.749 | 0.137  |
| S65 | 7.494 | 7.766 | -0.272 |
| S66 | 7.481 | 7.752 | -0.271 |
| S67 | 7.853 | 7.752 | 0.101  |
| S68 | 7.619 | 7.765 | -0.146 |
| S69 | 7.221 | 7.167 | 0.054  |
| S70 | 8.229 | 7.571 | 0.658  |
| S71 | 8.657 | 8.912 | -0.255 |
| S72 | 8.744 | 7.684 | 1.060  |
| S73 | 8.091 | 7.451 | 0.640  |
| S74 | 8.508 | 7.691 | 0.817  |
| S75 | 6.536 | 7.315 | -0.779 |
| S76 | 8.236 | 7.453 | 0.783  |
| S77 | 8.229 | 7.854 | 0.375  |
| S78 | 6.954 | 7.532 | -0.578 |
| S79 | 6.987 | 7.195 | -0.208 |
| S80 | 8.921 | 7.974 | 0.947  |
| S81 | 8.638 | 8.057 | 0.581  |
| S82 | 9.638 | 8.816 | 0.822  |
| S83 | 8.522 | 8.023 | 0.499  |
| S84 | 8.585 | 8.127 | 0.458  |
| S85 | 8.921 | 8.216 | 0.705  |
| S86 | 8.602 | 8.295 | 0.307  |
| S87 | 6.986 | 7.041 | -0.055 |
| S88 | 7.009 | 7.079 | -0.070 |
| S89 | 5.680 | 6.569 | -0.889 |
| S90 | 5.659 | 6.714 | -1.055 |
| S91 | 5.421 | 6.461 | -1.040 |
| S92 | 5.658 | 6.318 | -0.660 |
| S93 | 5.851 | 6.481 | -0.630 |
| S94 | 5.750 | 6.298 | -0.548 |
| S95 | 6.059 | 6.766 | -0.707 |
| S96 | 6.000 | 6.656 | -0.656 |
| S97 | 6.229 | 6.563 | -0.334 |

---

---

|      |       |       |        |
|------|-------|-------|--------|
| S98  | 7.105 | 6.412 | 0.693  |
| S99  | 7.373 | 7.560 | -0.187 |
| S100 | 6.982 | 7.518 | -0.536 |
| S101 | 7.203 | 7.127 | 0.076  |
| S102 | 8.136 | 7.387 | 0.749  |
| S103 | 7.326 | 7.613 | -0.287 |
| S104 | 7.366 | 7.492 | -0.126 |
| S105 | 6.211 | 6.631 | -0.420 |
| S106 | 7.411 | 7.133 | 0.278  |
| S107 | 7.869 | 7.613 | 0.256  |
| S108 | 7.823 | 7.141 | 0.682  |
| S109 | 6.101 | 6.399 | -0.298 |
| S110 | 7.809 | 7.477 | 0.332  |
| S111 | 7.185 | 6.482 | 0.703  |
| S112 | 6.782 | 6.898 | -0.116 |
| S113 | 7.065 | 7.715 | -0.650 |
| S114 | 6.735 | 6.887 | -0.152 |
| S115 | 6.728 | 6.333 | 0.395  |
| S116 | 7.407 | 6.718 | 0.689  |
| S117 | 7.108 | 6.528 | 0.580  |
| S118 | 7.183 | 6.687 | 0.496  |
| S119 | 7.651 | 6.757 | 0.894  |
| S120 | 7.926 | 7.626 | 0.300  |
| S121 | 6.872 | 6.674 | 0.198  |
| S122 | 6.903 | 6.674 | 0.229  |
| S123 | 7.756 | 7.658 | 0.098  |
| S124 | 8.148 | 7.936 | 0.212  |
| S125 | 8.207 | 8.407 | -0.200 |
| S126 | 7.958 | 7.974 | -0.016 |
| S127 | 7.593 | 7.701 | -0.108 |
| S128 | 6.657 | 7.534 | -0.877 |
| S129 | 6.570 | 7.534 | -0.964 |
| S130 | 7.619 | 7.497 | 0.122  |
| S131 | 8.823 | 8.051 | 0.772  |
| S132 | 7.853 | 8.033 | -0.180 |
| S133 | 7.600 | 8.056 | -0.456 |
| S134 | 8.440 | 7.923 | 0.517  |
| S135 | 8.590 | 8.120 | 0.470  |
| S136 | 8.470 | 8.059 | 0.411  |
| S137 | 7.710 | 8.101 | -0.391 |
| S138 | 8.714 | 8.120 | 0.594  |
| S139 | 8.396 | 8.122 | 0.274  |
| S140 | 8.812 | 8.059 | 0.753  |
| S141 | 8.573 | 8.124 | 0.449  |
| S142 | 8.694 | 7.930 | 0.764  |

---
